# Supplementary material for: Protonated 3-amino-1,2,4-triazole templated luminescent lanthanide isophthalates with a rare (3,6)-connected topology
Source: Royal Society of Chemistry journal article supplement (doi:10.1039/b907107e), 2009-01-01
Supplement: b907107e.pdf [file b907107e.pdf]

Supporting information for

**Protonated 3-amino-1,2,4-triazole templated luminescent lanthanide isophthalates with rare (3, 6)-connected topology†**

Pei-Xiu Yin,<sup>a,b</sup> Jian Zhang,<sup>a</sup> Zhao-Ji Li,<sup>a</sup> Lei Zhang,<sup>a</sup> Qi-Pu Lin,<sup>a</sup> Ye-Yan Qin,<sup>a</sup> and Yuan-Gen Yao<sup>\*a</sup>

Received (in XXX, XXX) Xth XXXXXXXXX 200X, Accepted Xth XXXXXXXXX 200X

First published on the web Xth XXXXXXXXX 200X

DOI: 10.1039/b000000x

<sup>a</sup> State Key Laboratory of Structural Chemistry, Fujian Institute of Research on the Structure of Matter, the Chinese Academy of Sciences, Fuzhou 350002 (P. R. China). E-mail: yyg@fjirsm.ac.cn.

<sup>b</sup> Graduate School of The Chinese Academy of Sciences, Beijing 100039, China

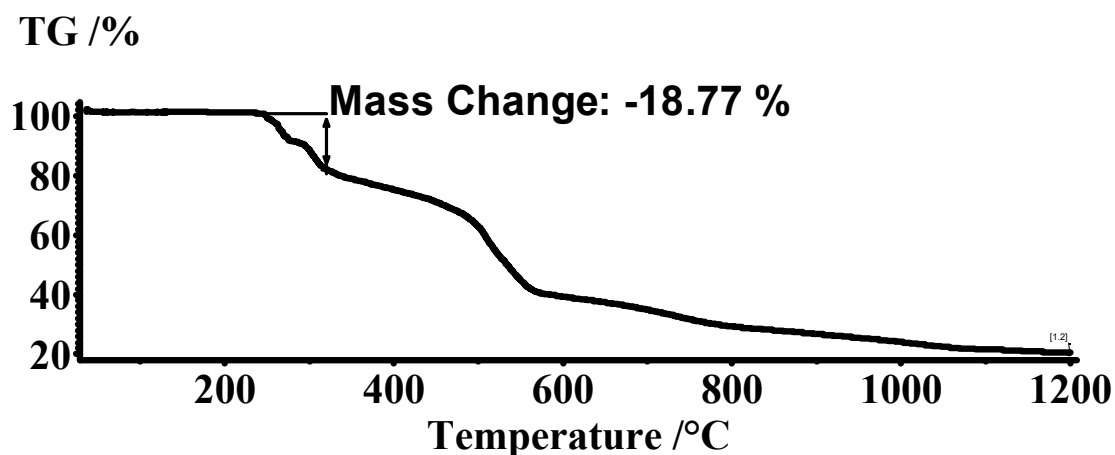

Fig. S1 The TGA curve of compound **1** under nitrogen atmosphere.
